# Supplementary material for: Monitoring snowpack outflow volumes and their isotopiccomposition to better understand streamflow generation duringrain-on-snow events
Source: Copernicus journal article supplement (doi:10.5194/hess-2019-11), 2019-01-31
Supplement: Supplementary file 1 [file hess-2019-11-supplement.pdf]

*Supplement of*

## **Monitoring snowpack outflow volumes and its isotopic composition to better understand streamflow generation during rain-on-snow events**

Andrea Rucker<sup>1,2</sup>, Stefan Boss<sup>1</sup>, James W. Kirchner<sup>2,1</sup>, von Freyberg, Jana<sup>2,1</sup>

<sup>1</sup>Swiss Federal Institute for Forest, Snow and Landscape Research (WSL), Zürcherstrasse 111, 8903 Birmensdorf, Switzerland

<sup>2</sup>Department of Environmental System Science, ETH Zürich, Universitätsstrasse 16, 8092 Zurich, Switzerland

*Correspondence to:* Andrea Rucker (andrea.ruecker@wsl.ch)

- Figure A1 with the data of the winter period 2018 (1 November 2017 – 30 April): MF site (snowpack outflow, air temperature, snow depth) and discharge of the catchment outlet
- Table A1 with the contributions of rainfall or snowpack outflow to streamflow during peak flow based on two-component isotope hydrograph separation using on  $\delta^{18}\text{O}$

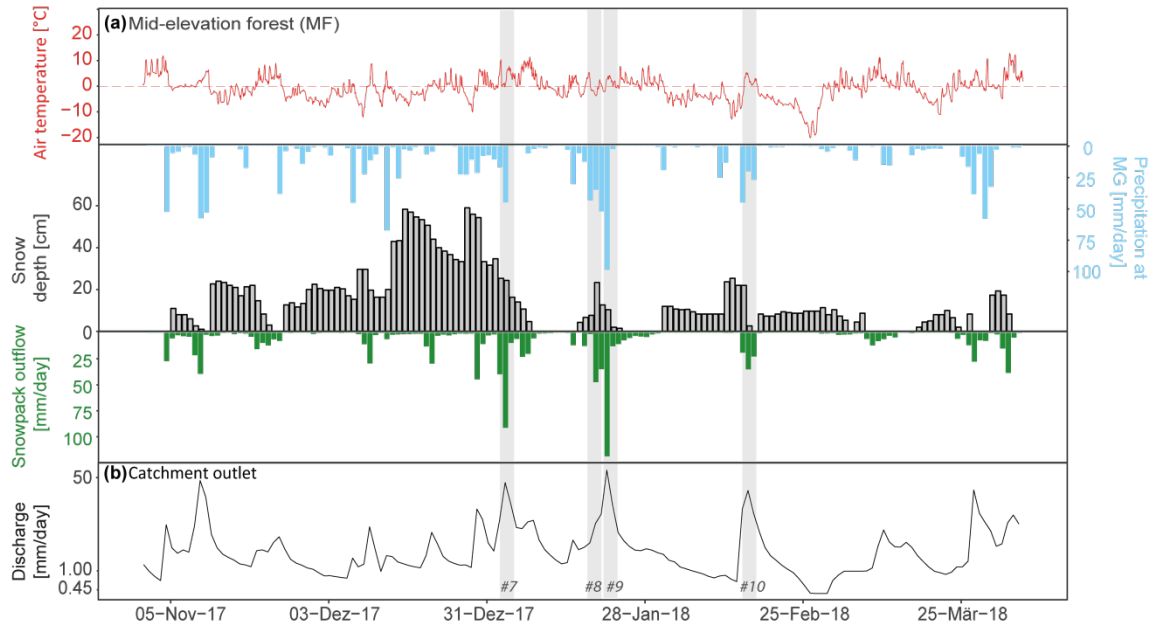

**Figure A 1: Measurements of daily precipitation (snow-and rainfall) volumes measured at the MG site during the winter 2018 period, as well as hourly air temperature, snow depth, and snowpack outflow volumes measured at the (a) mid-elevation forest site (MF, green) for the study period 1 November 2017 – 6 April 2018. Panel (b) shows daily discharge at the Erlenbach catchment outlet (on log scale). Vertical grey bars indicate the four rain-on-snow (ROS #7-#10) events that are analysed in this study.**

**Table A1: Contributions of rainfall or snowpack outflow to streamflow during peak flow based on two-component isotope hydrograph separation using on  $\delta^{18}\text{O}$  (HG: high-elevation grassland site; MG: mid-elevation grassland site; MF: mid-elevation forest site).**

| ROS event number | Contribution to discharge $\pm$ SE (%) |                     |                     |                 |
|------------------|----------------------------------------|---------------------|---------------------|-----------------|
|                  | Snowpack outflow HG                    | Snowpack outflow MG | Snowpack outflow MF | Rainfall MG     |
| #1               | a)                                     | $1.17 \pm 0.21$     | $1.91 \pm 1.18$     | $0.68 \pm 0.11$ |
| #2               | $0.43 \pm 0.09$                        | b)                  | $1.67 \pm 0.92$     | b)              |
| #3               | $-0.19 \pm 0.15$                       | $-0.59 \pm 0.61$    | $0.26 \pm 0.19$     | $0.11 \pm 0.08$ |
| #4               | a)                                     | $0.30 \pm 0.12$     | $0.51 \pm 0.16$     | $2.05 \pm 9.47$ |
| #5               | $1.70 \pm 0.61$                        | $0.41 \pm 0.09$     | $0.30 \pm 0.06$     | $0.2 \pm 0.04$  |
| #6               | $0.78 \pm 0.26$                        | $0.12 \pm 0.05$     | $0.22 \pm 0.08$     | $0.09 \pm 0.04$ |

a) no snowpack outflow occurred

b) data gap
